# Supplementary material for: APIFLAME v2.0 biomass burning emissions model: impact of refined input parameters on atmospheric concentration in Portugal in summer 2016
Source: Copernicus journal article supplement (doi:10.5194/gmd-13-2981-2020), 2020-07-08
Supplement: Supplementary file 1 [file gmd-13-2981-2020-supplement.zip]

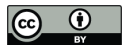

## *Supplement of*

# **APIFLAME v2.0 biomass burning emissions model: impact of refined input parameters on atmospheric concentration in Portugal in summer 2016**

**Solène Turquety et al.**

*Correspondence to:* Solène Turquety ([solene.turquety@lmd.polytechnique.fr](mailto:solene.turquety@lmd.polytechnique.fr))

- [gmd-13-2981-2020-supplement-title-page.pdf](#)
- [supplement](#)
  - [.DS\\_Store](#)
  - [figures\\_suppl](#)
    - \* [.DS\\_Store](#)
    - \* [fig01a\\_s.eps](#)
    - \* [fig01b\\_s.eps](#)
    - \* [fig01c\\_s.eps](#)
    - \* [fig01d\\_s.eps](#)
    - \* [fig01e\\_s.eps](#)
    - \* [fig01f\\_s.eps](#)
    - \* [fig01g\\_s.eps](#)
    - \* [fig01h\\_s.eps](#)
    - \* [fig01i\\_s.eps](#)
    - \* [fig01j\\_s.eps](#)
    - \* [fig01k\\_s.eps](#)
    - \* [fig01l\\_s.eps](#)
    - \* [fig01m\\_s.eps](#)
    - \* [fig02a\\_s.png](#)
    - \* [fig02b\\_s.png](#)
    - \* [fig02c\\_s.png](#)
  - [st\\_apiflame2\\_gmd\\_suppl.pdf](#)
  - [st\\_apiflame2\\_gmd\\_suppl.tex](#)

The copyright of individual parts of the supplement might differ from the CC BY 4.0 License.
