# Supplementary material for: APIFLAME v2.0 biomass burning emissions model: impact of refined input parameters on atmospheric concentration in Portugal in summer 2016
Source: Copernicus journal article supplement (doi:10.5194/gmd-13-2981-2020), 2020-07-08
Supplement: Supplementary file 2 [file gmd-13-2981-2020-supplement.zip]

# ***Supplement of*** **APIFLAME v2.0 trace gas and aerosol emissions from biomass burning: application to Portugal during the summer of 2016 and evaluation against satellite observations of CO (IASI) and AOD (MODIS)**

S. Turquety *et al.*

**Correspondence:** Solène Turquety (solene.turquety@lmd.polytechnique.fr)

## **S1 Emission factors list**

The emission factors for the trace gases and aerosol species included in the distributed version of APIFLAMEv2 are provided in Tables S1 and S2, respectively.

## **S2 Contribution from small fires to the calculated burned area**

- 5 Figure S1 shows the monthly burned area for the 5-year period 2013–2017, as calculated in APIFLAMEv2.0 based on the MODIS MCD64 dataset and including possible missed detection from small fires estimated using the MOD14 active fires product (Fire Radiative Power dataset).

## **S3 Long-range transport of dust from North Africa**

- Figure S2 shows dust simulations by the MERRA-2 model (including assimilation) plotted using the Giovanni NASA database  
10 (<https://giovanni.gsfc.nasa.gov/giovanni/>) to extract dust simulations (including assimilation).

**Table S1.** Emission factors (in g/kg DM) used for the gaseous species included in the inventory.

|                            | Tropical<br>Forest | Savanna | Crop<br>residue | Pasture<br>Maintenance | Boreal<br>forest | Temperate<br>forest | Peatland<br>forest | Chaparral |
|----------------------------|--------------------|---------|-----------------|------------------------|------------------|---------------------|--------------------|-----------|
| Carbon Dioxide             | 1643.00            | 1686.00 | 1585.00         | 1548.00                | 1489.00          | 1637.00             | 1563.00            | 1680.00   |
| Carbon Monoxide            | 93.00              | 63.00   | 102.0           | 135.00                 | 127.00           | 88.00               | 182.00             | 67.40     |
| Methane                    | 5.07               | 2.00    | 5.82            | 8.71                   | 5.96             | 3.36                | 11.8               | 3.0       |
| Acetylene                  | 0.44               | 0.24    | 0.27            | 0.21                   | 0.18             | 0.26                | 0.14               | 0.21      |
| Ethylene                   | 1.06               | 0.88    | 1.46            | 1.28                   | 1.42             | 1.17                | 1.79               | 1.00      |
| Ethane                     | 0.71               | 0.66    | 0.91            | 0.95                   | 1.79             | 0.63                | 0.                 | 0.42      |
| Propadiene incl in propyne | 0.016              | 0.012   | 0.              | 0.020                  | 0.               | 0.                  | 0.                 | 0.0283    |
| Propylene                  | 0.64               | 0.70    | 0.68            | 0.85                   | 1.13             | 0.61                | 2.30               | 0.481     |
| Propyne                    | 0.                 | 0.      | 0.              | 0.                     | 0.059            | 0.042               | 0.                 | 0.        |
| Propane                    | 0.126              | 0.10    | 0.28            | 0.22                   | 0.44             | 0.22                | 0.                 | 0.5395    |
| Isoprene                   | 0.13               | 0.068   | 0.38            | 0.12                   | 0.15             | 0.101               | 1.07               | 0.0465    |
| Benzene                    | 0.39               | 0.21    | 0.15            | 0.70                   | 1.11             | 0.                  | 2.46               | 0.451     |
| Toluene                    | 0.26               | 0.10    | 0.19            | 0.34                   | 0.48             | 0.19                | 1.21               | 0.174     |
| Xylenes                    | 0.11               | 0.030   | 0.              | 0.11                   | 0.18             | 0.127               | 0.                 | 0.1       |
| Terpenes                   | 0.                 | 0.031   | 0.              | 0.                     | 3.09             | 1.822               | 0.                 | 0.251     |
| Ethanol                    | 0.                 | 0.      | 0.              | 0.                     | 0.055            | 0.10                | 0.                 | 0.055     |
| Methanol                   | 2.43               | 1.18    | 3.29            | 5.84                   | 2.82             | 1.73                | 5.36               | 1.35      |
| Phenol                     | 0.45               | 0.44    | 0.52            | 1.68                   | 2.96             | 0.3 (verif)         | 4.36               | 0.        |
| Acetol                     | 1.13               | 0.      | 3.766           | 6.18                   | 0.0              | 0.0                 | 1.92               | 0.0       |
| Formaldehyde               | 1.73               | 1.18    | 2.08            | 1.90                   | 1.86             | 2.08                | 1.69               | 1.33      |
| Acetone                    | 0.63               | 0.30    | 0.45            | 1.05                   | 0.75             | 0.54                | 1.08               | 0.31      |
| Methyl Vinyl Ether         | 0.                 | 0.16    | 0.08            | 0.                     | 0.               | 0.                  | 0.85               | 0.        |
| Acetic Acid                | 3.84               | 3.89    | 6.59            | 10.6                   | 4.98             | 2.498               | 7.78               | 2.014     |
| incl formic acid           |                    |         |                 |                        |                  |                     |                    |           |
| Hydrogen Cyanide           | 0.42               | 0.39    | 0.29            | 0.46                   | 1.52             | 0.72                | 5.00               | 1.        |
| Carbonyl Sulfide           | 0.025              | 0.      | 0.              | 0.                     | 0.46             | 0.001 (verif)       | 1.20               | 0.        |
| Ammonia                    | 1.33               | 0.56    | 2.17            | 1.47                   | 2.72             | 0.84                | 10.8               | 1.20      |
| 1,2,3-Trimethylbenzene     | 0.                 | 0.042   | 0.              | 0.                     | 0.051            | 0.                  | 0.                 | 0.        |
| 1,2,4-Trimethylbenzene     | 0.                 | 0.      | 0.              | 0.                     | 0.030            | 0.                  | 0.                 | 0.        |
| Other Aromatics            | 3.1                | 0.321   | 0.355           | 0.079                  | 0.071            | 2.930               | 0.                 | 2.073     |
| Butane and higher alkanes  | 0.073              | 0.171   | 0.133           | 0.064                  | 0.348            | 0.26                | 0.                 | 0.171     |
| Butene and higher alkenes  | 0.258              | 0.037   | 0.351           | 0.37                   | 0.339            | 0.56                | 0.                 | 0.385     |
| All non HCHO aldehydes     | 4.61               | 3.583   | 2.721           | 3.374                  | 0.056            | 1.58                | 4.7313             | 0.1687    |
| All non-acetone ketones    | 1.2                | 1.53    | 0.              | 2.555                  | 0.424            | 1.49                | 0.                 | 0.803     |
| All Furans                 | 2.374              | 0.869   | 0.132           | 2.85                   | 0.965            | 0.73                | 1.82               | 0.693     |
| Hydrogen                   | 3.36               | 1.70    | 2.59            | 0.                     | 0.               | 2.03                | 0.                 | 0.        |
| Sulfur Dioxide             | 0.40               | 0.9     | 0.4             | 0.32                   | 1.               | 1.1                 | 0.                 | 1.        |
| Nitrous Acid               | 1.18               | 0.36    | 0.              | 0.16                   | 0.52             | 0.44                | 0.                 | 0.54      |
| Nitrogen Oxides (as NO)    | 2.55               | 3.9     | 3.11            | 0.75                   | 0.90             | 1.91                | 0.8                | 3.65      |
| Nitrous Oxide              | 0.                 | 0.      | 0.              | 0.                     | 0.41             | 0.16                | 0.                 | 0.25      |

**Table S2.** Emission factors (in g/kg DM) used for the aerosol species included in the inventory.

|                 | Tropical<br>Forest | Savanna | Crop<br>residue | Pasture<br>Maintenance | Boreal<br>forest | Temperate<br>forest | Peatland<br>forest | Chaparral |
|-----------------|--------------------|---------|-----------------|------------------------|------------------|---------------------|--------------------|-----------|
| Black Carbon    | 0.52               | 0.37    | 0.75            | 0.91                   | 0.56             | 0.56                | 0.20               | 1.31      |
| Organic Carbon  | 4.71               | 2.62    | 2.30            | 9.64                   | 9.2              | 4.75                | 6.23               | 3.7       |
| Nitrate         | 0.11               | 0.016   | 0.              | 0.14                   | 0.               | 0.                  | 0.                 | 0.        |
| Sulfate         | 0.13               | 0.018   | 0.              | 0.19                   | 0.               | 0.                  | 0.                 | 0.        |
| Other PPM       | 1.04               | 2.61    | 1.83            | 0.                     | 0.02             | 0.02                | 0.                 | 4.62      |
| PM2.5           | 9.1                | 7.17    | 6.26            | 14.8                   | 15.3             | 12.8                | 10.2               | 11.9      |
| PCO (PM10-PM25) | 9.4                | 1.33    | 0.              | 14.1                   | 2.3              | 4.9                 | 0.                 | 3.5       |

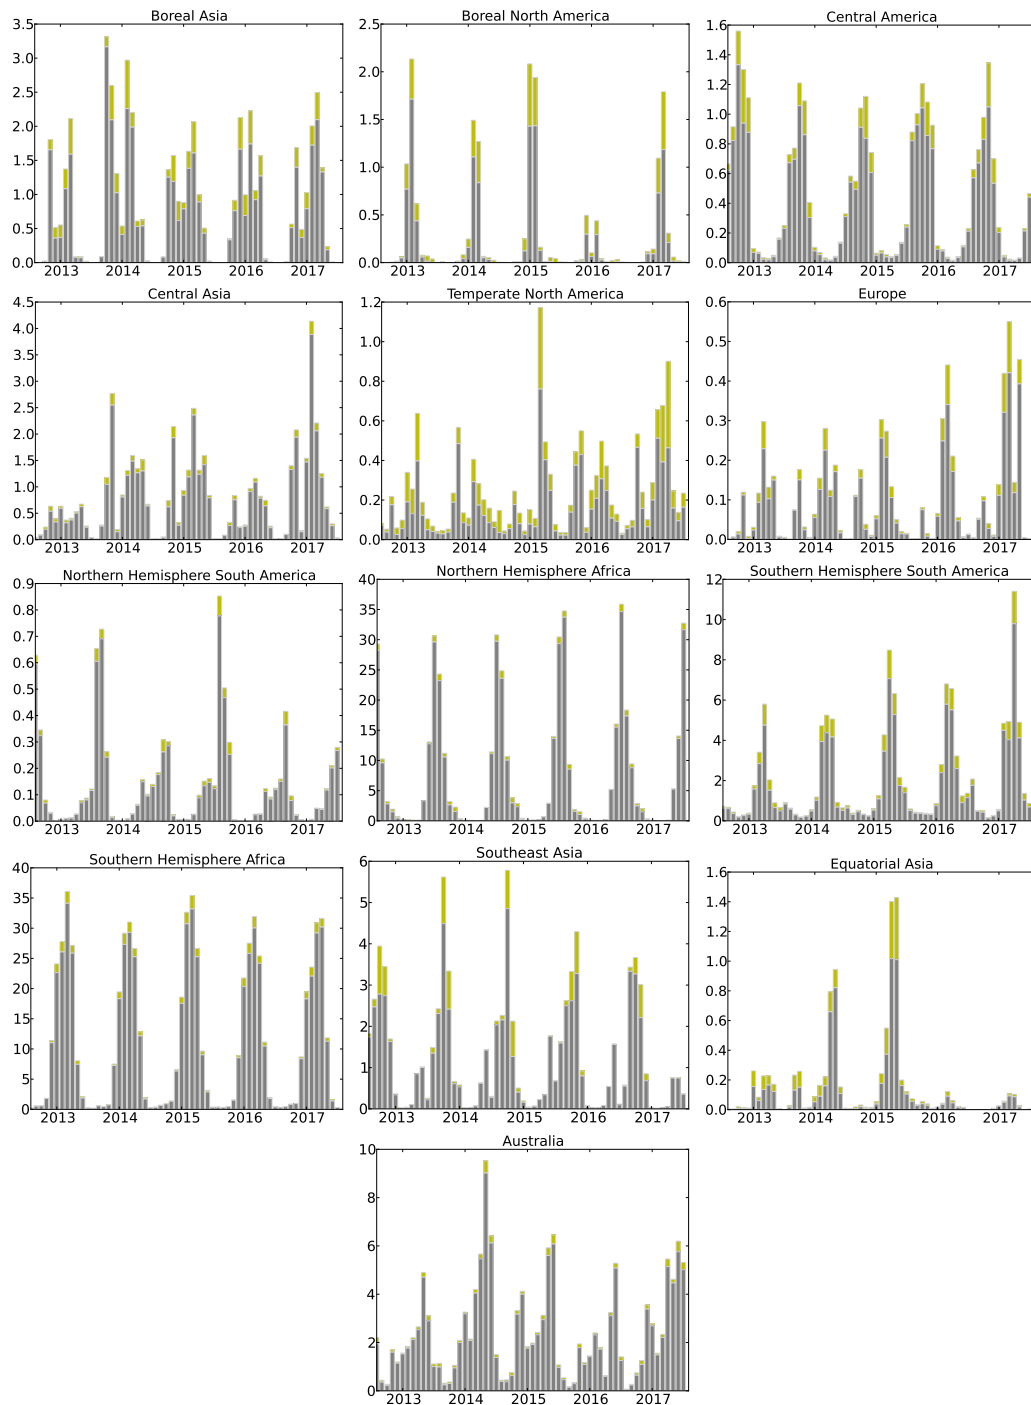

**Figure S1.** Monthly regional burned area ( $10^4 \text{ km}^2$  or Mha) derived from MODIS MCD64 data (grey) and additional contribution from small fires, as detected in the MODIS MOD14 product (light green). Ticks on the abscissa correspond to the month of June of each year.

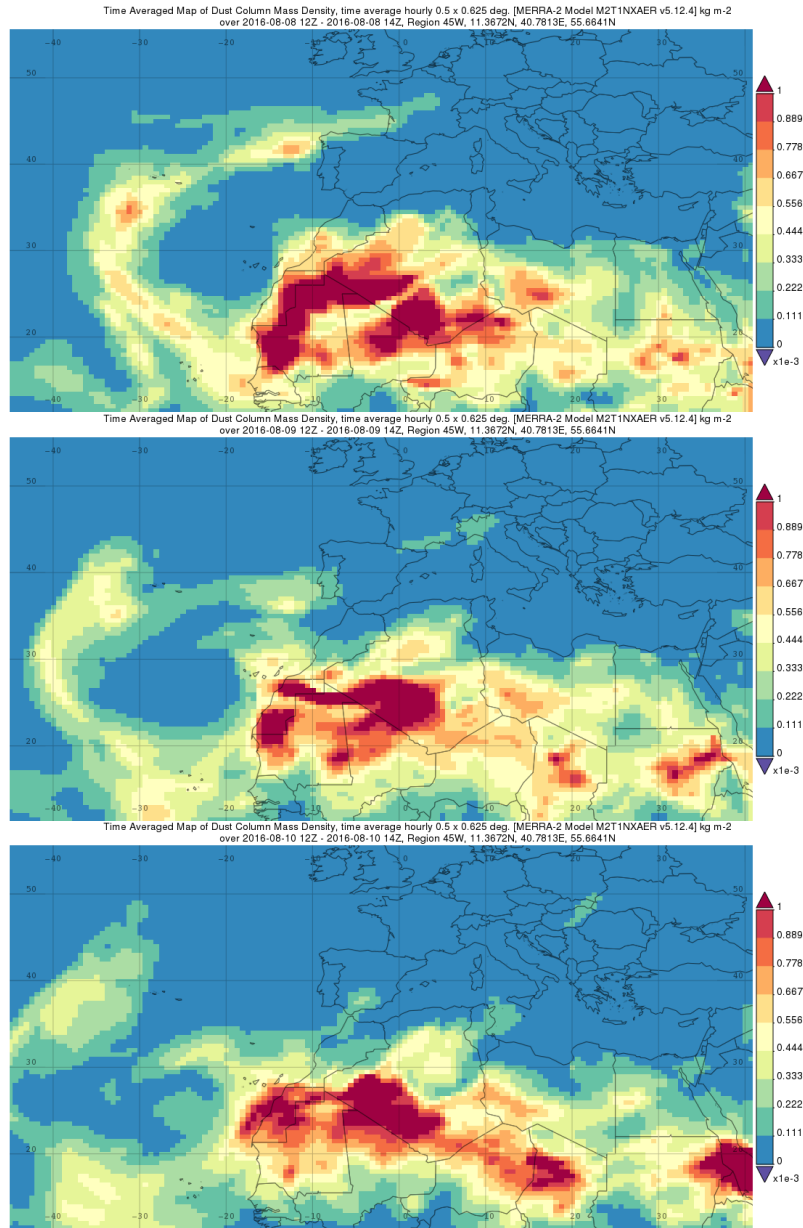

**Figure S2.** Mineral dust total mass density from the global databases displayed with Giovanni (<https://giovanni.gsfc.nasa.gov/giovanni/>; MERRA-2 model simulations including data assimilation).
